# Supplementary material for: Intravaginal immunisation using a novel antigen-releasing ring device elicits robust vaccine antigen-specific systemic and mucosal humoral immune responses
Source: PubMed Central journal article supplement (PMC5333785; doi:10.1016/j.jconrel.2017.01.018), 2017-03-10

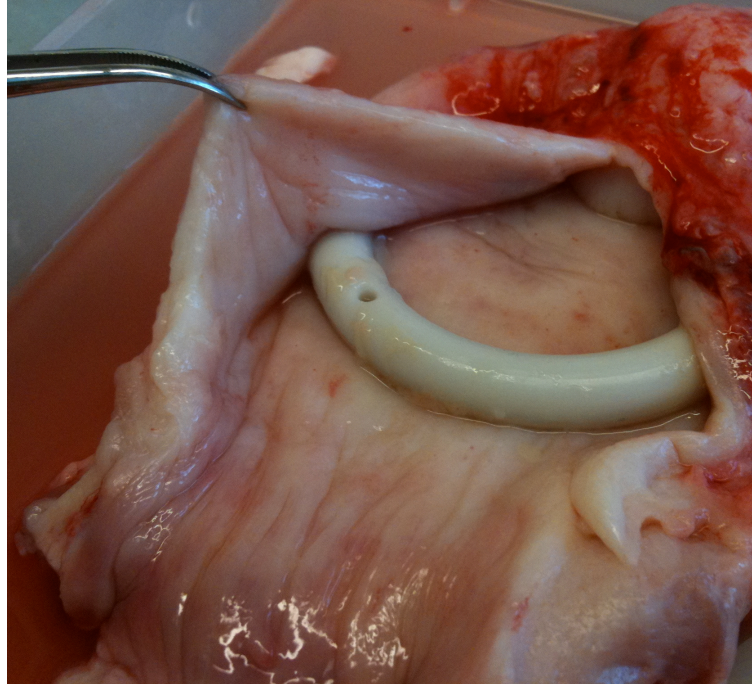

Supplement: mmc1.pdf [file mmc1.pdf]
